# Supplementary material for: Enveloped Virus Inactivation on Personal Protective Equipment by Exposure to Ozone
Source: PubMed Central journal article supplement — medRxiv. 2020 May 27:2020.05.23.20111435. Preprint. [Version 2] doi: 10.1101/2020.05.23.20111435 (PMC7273279; doi:10.1101/2020.05.23.20111435), 2020-05-27
Supplement: NIHPP2020.05.23.20111435-supplement-1.pdf [file NIHPP2020.05.23.20111435-supplement-1.pdf]

## Enveloped Virus Inactivation on Personal Protective Equipment by Exposure to Ozone

Emmeline L. Blanchard,<sup>a</sup> Justin D. Lawrence,<sup>b</sup> Jeffery A. Noble,<sup>c</sup> Minghao Xu,<sup>c</sup> Taekyu Joo,<sup>b</sup>  
Nga Lee Ng,<sup>b,d,e</sup> Britney Schmidt,<sup>b</sup> Philip J. Santangelo,<sup>a</sup> M.G. Finn<sup>c,f,\*</sup>

<sup>a</sup>Wallace H. Coulter Department of Biomedical Engineering, <sup>b</sup>School of Earth and Atmospheric Sciences, <sup>c</sup>Parker H. Petit Institute for Bioengineering and Bioscience, <sup>d</sup>School of Chemistry and Biochemistry, <sup>e</sup>School of Chemical and Biomolecular Engineering, <sup>f</sup>School of Civil and Environmental Engineering, <sup>g</sup>School of Biological Sciences; Georgia Institute of Technology, Atlanta, GA, USA

### Supplemental Information

**Table S1.** Materials used in assessments of virus inactivation, mechanical robustness, and filtration efficiency.

| type             | make and model                    | used for virus test? | used for mechanical test? |
|------------------|-----------------------------------|----------------------|---------------------------|
| N95 respirator   | 3M, <a href="#">8210</a>          | yes                  | yes                       |
| N95 respirator   | 3M, <a href="#">8515</a>          | yes                  | yes                       |
| N95 respirator   | Sperian, <a href="#">N1115 XL</a> | yes                  | yes                       |
| N95 respirator   | Sperian, <a href="#">N1125 S</a>  | yes                  | yes                       |
| KN95             | ZKG9501                           | yes                  | yes                       |
| N95 respirator   | Int'l Sourcing, NX95V             | yes                  | yes                       |
| Tyvek gown       | HDPE Dupont Tyvek                 | yes                  | yes                       |
| PAPR hood        | 3M Breathe Easy <sup>®</sup>      | yes                  | no                        |
| cloth facemask   | <i>unmarked</i>                   | yes                  | yes                       |
| Tyvek bunny suit | <i>unmarked</i>                   | yes                  | no                        |

**Table S2.** Ozone treatment devices assessed.

| Device                                                       | Volume (m <sup>3</sup> ) | Standard Time (m) | Standard [O <sub>3</sub> ] (ppm) | Typical Humidity | O <sub>3</sub> generator | Control Sensor, Logging Sensor                                                            |
|--------------------------------------------------------------|--------------------------|-------------------|----------------------------------|------------------|--------------------------|-------------------------------------------------------------------------------------------|
| <a href="#">Global Ozone Decon-Zone 4201A Cabinet</a>        | 0.53                     | 16                | 20                               | ambient*         | corona discharge         | EcoSensor SM-7 0-20 ppm, recorded to SD card at 0.1 Hz                                    |
| <a href="#">Global Ozone OT-100 Trailer</a>                  | ~30                      | < 99              | ≥ 20                             | ambient*         | corona discharge         | EcoSensor SM-6 0-20 ppm, recorded <a href="#">via USB O<sub>3</sub> Sensor</a> at 1 Hz**  |
| <a href="#">Zono SC 1 Cabinet</a>                            | 0.73                     | 18                | 20                               | 80%              | deep UV                  | EcoSensor SM-7 0-50 ppm, recorded <a href="#">via USB O<sub>3</sub> Sensor</a> at 1 Hz**  |
| <a href="#">VirtuCLEAN 2.0 Waterless CPAP Cleaning Pouch</a> | < 0.01                   | 30                | 15-16                            | ambient*         | unknown                  | No concentration readout. Recorded <a href="#">via USB O<sub>3</sub> Sensor</a> at 1 Hz** |

\*not controlled

\*\*[SPEC Sensors Digital O<sub>3</sub> Sensor \(DGS-O3 968-042\)](#)

**Table S3.** Characteristics of ozone, temperature, and humidity sensors used.

| Sensor                                      | Range (ppm) | Accuracy                 | Response Time (s) | Other parameters?       |
|---------------------------------------------|-------------|--------------------------|-------------------|-------------------------|
| EcoSensors <a href="#">SM-7</a>             | 0.3-20.0    | greater of ±10% or ±0.03 | < 60              | temp, relative humidity |
| EcoSensors <a href="#">SM-7</a>             | 0.3-50.0    | greater of ±10% or ±0.2  | < 60              | temp, relative humidity |
| EcoSensors <a href="#">SM-6</a>             | 0.8-50.0    | greater of ±10% or ±0.2  | < 60              | temp, relative humidity |
| SPEC Sensors <a href="#">DGS-O3 968-042</a> | 0-5*        | ±15%                     | < 30              | temp, relative humidity |

\* observed linearity to at least 45 ppm, as determined by comparison to response from SM-7

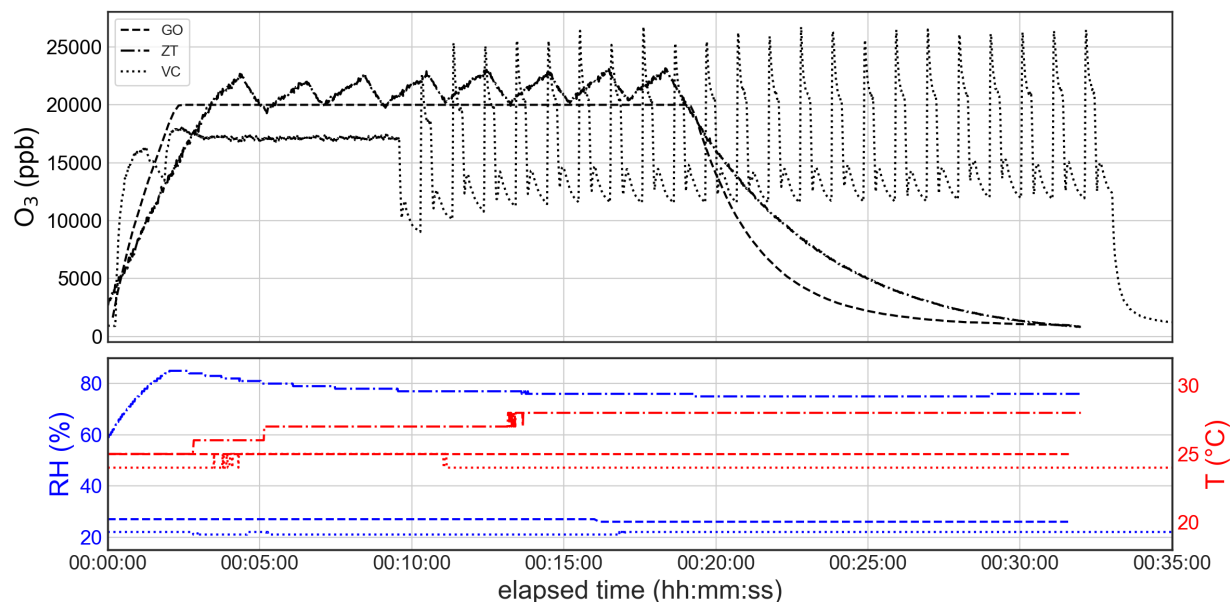

**Figure S1.** Comparison of ozone concentration, temperature, and humidity during a standard run cycle for each device. Line style convention for bottom plot follows from first plot. Also demonstrates these treatment devices do not exceed commonly recommended N95 respirator storage temperatures of < 30°C. GO = Global Ozone cabinet, ZT = Zono Technologies cabinet, VC = VirtuCLEAN portable PAP disinfection zippered pouch.

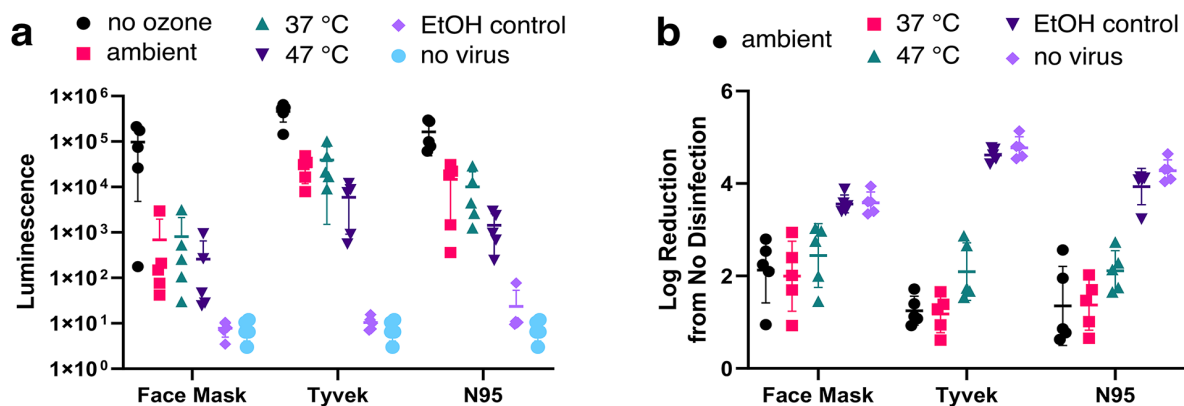

**Figure S2.** Inactivation of influenza A virus by ozone as a function of temperature, holding atmospheric moisture roughly constant. Here the data are displayed for illustrative purposes in terms of (a) observed luminescence from the NanoLuc assay and (b) reduction of viral infectivity derived from the data in panel (a). Approximate water vapor concentrations: ambient (25 °C), 14.3 g/m<sup>3</sup> = 62% RH; 37 °C, 14.5 g/m<sup>3</sup> = 33% RH; 45 °C, 17.7 g/m<sup>3</sup> = 27% RH.

**Table S4.** Results of mechanical assessments.

| item                                       | make and model                        | exposure time (20 ppm) | observations of appearance and mechanical properties                         |
|--------------------------------------------|---------------------------------------|------------------------|------------------------------------------------------------------------------|
| N95 respirator                             | 3M, <a href="#">8210</a>              | 320 m                  | no significant changes                                                       |
| N95 respirator                             | 3M, <a href="#">8515</a>              | 160 m                  | No changes in respirator material, elastic bands failed at staple attachment |
| N95 respirator                             | Sperian, <a href="#">N1115 XL</a>     | 320 m                  | No changes in respirator material, elastic bands failed at staple attachment |
| N95 respirator                             | Sperian, <a href="#">N1125 S</a>      | 230 m                  | No changes in respirator material, elastic bands failed at staple attachment |
| N95 respirator                             | <i>KN95</i> , <a href="#">ZKG9501</a> | 160 m                  | no significant changes                                                       |
| N95 respirator                             | <a href="#">NX95V</a>                 | 160 m                  | No changes in respirator material, elastic bands failed at staple attachment |
| Surgical mask                              | <i>unmarked</i>                       | 320 m                  | no significant changes                                                       |
| clear polycarbonate (face shield, goggles) | <i>unmarked</i>                       | 160 m                  | no significant changes                                                       |
| Tyvek disposable gown                      | <i>unmarked</i>                       | 160 m                  | no significant changes                                                       |
| Tyvek PAPR hood fabric                     | 3M Breathe Easy®                      | 160 m                  | no significant changes                                                       |

**Table S5.** Results of particle filtration efficiency assessments.

| Manufacturer           | Model                    | Duration of ozone exposure | Control <sup>a</sup> | Result <sup>b</sup>  |
|------------------------|--------------------------|----------------------------|----------------------|----------------------|
| 3M                     | <a href="#">8210</a>     | 320 min                    | yes                  | pass                 |
| 3M                     | <a href="#">8515</a>     | 160 min                    | no                   | pass                 |
| Sperian                | <a href="#">N1115 XL</a> | 320 min                    | yes                  | pass                 |
| Sperian                | <a href="#">N1125 S</a>  | 230 min                    | no                   | pass                 |
| KN95                   | <a href="#">ZKG9501</a>  | 160 min                    | no                   | unknown <sup>c</sup> |
| International Sourcing | <a href="#">NX95V</a>    | 160 min                    | no                   | unknown <sup>d</sup> |
| <i>unmarked</i>        | surgical mask            | 320 min                    | yes                  | pass <sup>e</sup>    |

a) Filtration efficiency was not measured for the corresponding untreated sample. b) "Pass" denotes similar filtration efficiency compared to a corresponding control measurement, or filtration efficiency >95% for respirators lacking a control measurement. c) Filtration efficiency >89%; without comparison to a control sample, change due to ozone treatment could not be assessed. d) Filtration efficiency >92%; without comparison to a control sample, change due to ozone treatment could not be assessed. e) Filtration efficiency appears to be higher for the treated sample (reason unknown), but both untreated and treated samples have low overall filtration efficiency.

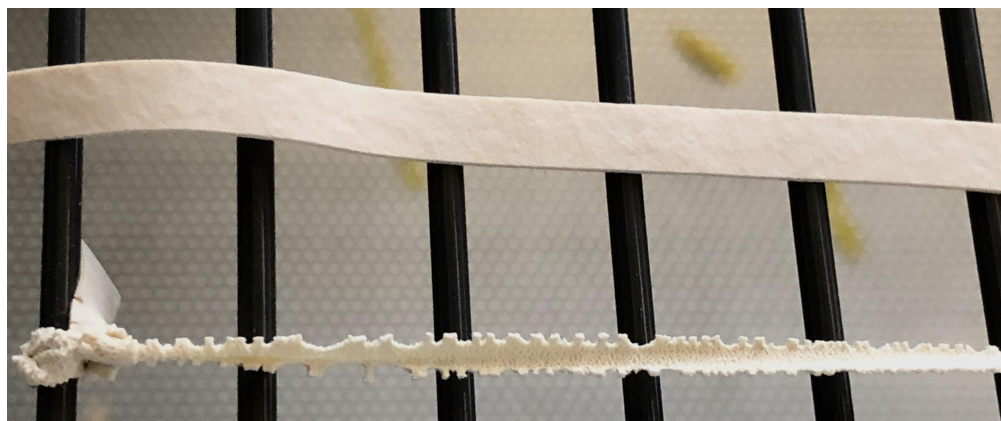

**Figure S3.** Example of strain-induced ozone damage (20 ppm, 30 minutes, 24°C, 38% RH) to bands separated from a Sperian N1125 respirator. (*Top*) Relaxed (not stretched) band underwent no visible damage and remained functional; (*bottom*) band tied off at 2.4 times its relaxed length during ozone exposure failed.

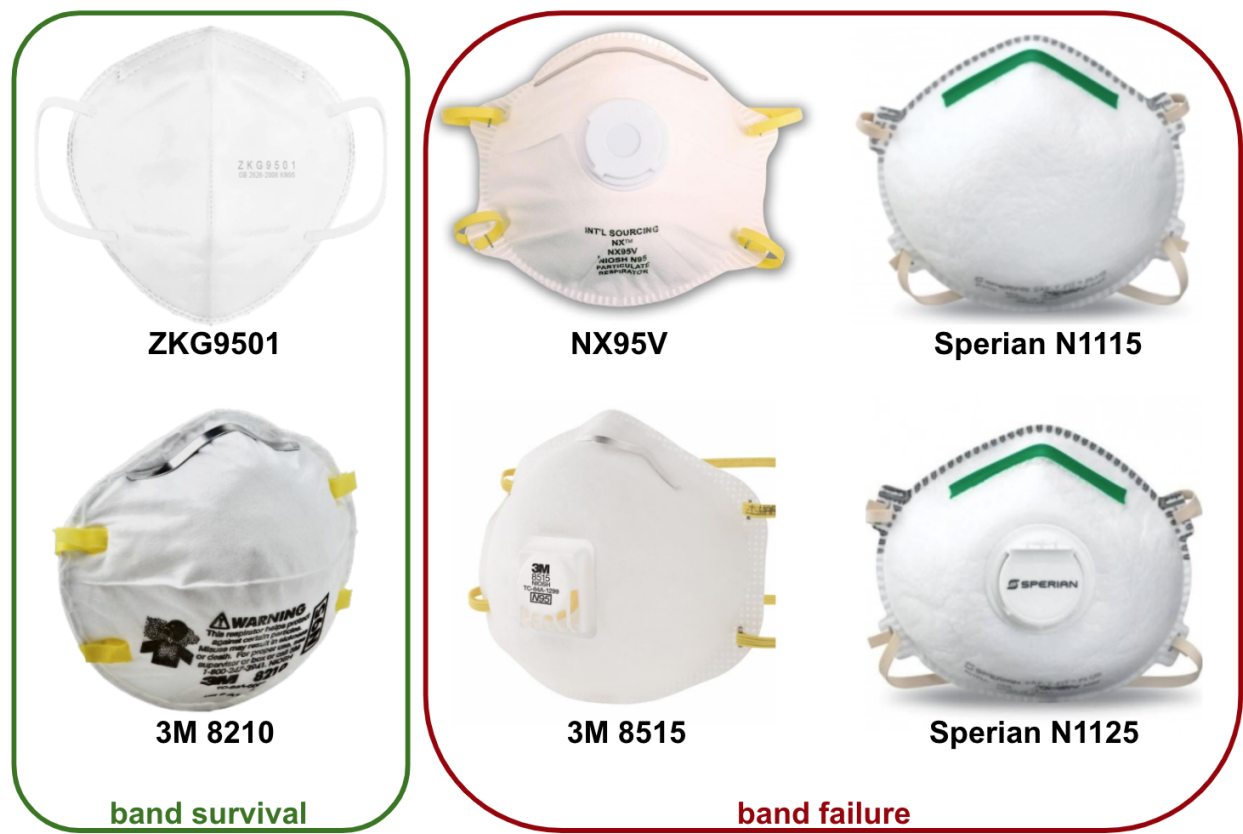

**Figure S4.** Respirators assessed for headband compatibility with ozone disinfection. All of the respirators with failed bands feature stapled attachments.

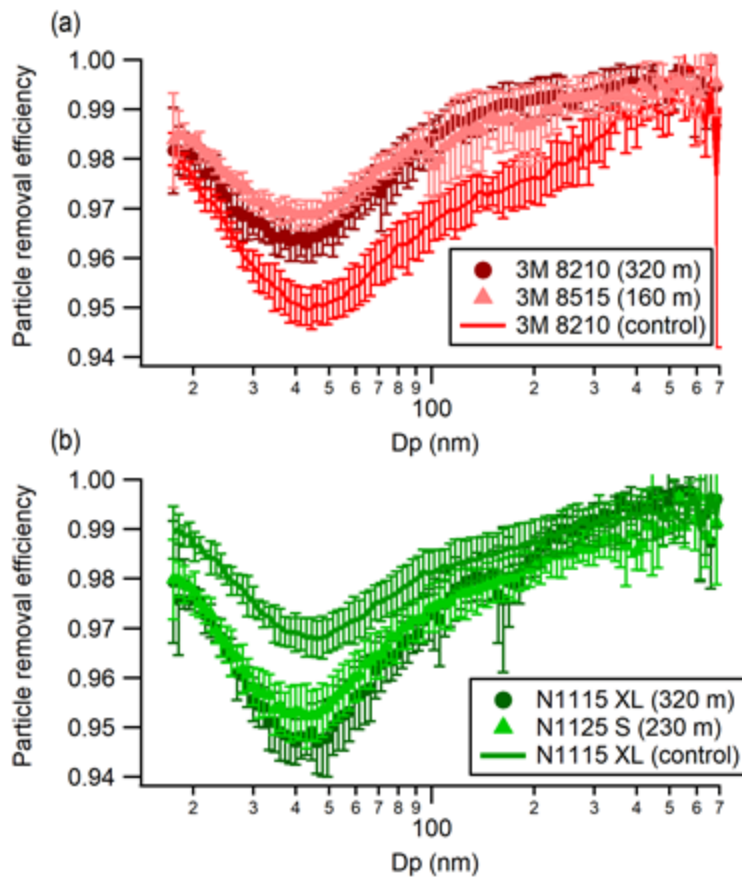

**Figure S5.** Particle filtration efficiency of untreated (control) and ozone-treated N95 respirators. Uncertainties are calculated from one standard deviation of aerosol volume concentration measured by the SMPS instrument. a) 3M 8210 and 8515 respirators. b) Sperial N1115 XL and N1125 S respirators.
